# Supplementary material for: Design and assembly of porous organic cages
Source: Royal Society of Chemistry journal article supplement (doi:10.1039/d3cc05091b), 2024-01-01
Supplement: d3cc05091b1.pdf [file d3cc05091b1.pdf]

## Supporting Information

### Design and Assembly of Porous Organic Cages

Ze Zhao Xu<sup>#</sup>, Yangzhi Ye<sup>#</sup>, Yilan Liu<sup>#</sup>, Huiyu Liu<sup>\*</sup>, Shan Jiang<sup>\*</sup>

School of Physical Science and Technology, ShanghaiTech University, Shanghai 201210, China

<sup>\*</sup> Corresponding author. Email: [jiangshan@shanghaitech.edu.cn](mailto:jiangshan@shanghaitech.edu.cn)

<sup>#</sup> Ze Zhao Xu, Yangzhi Ye and Yilan Liu contributed equally.

**Table S1.** Some reported POCs since 2009. The data was gathered from POCs with crystal structures deposited in the Cambridge Crystallographic Data Centre (CCDC) since 2009.

| Examples                             | Year | BET (m <sup>2</sup> /g) | Applications                                                             | Reference |
|--------------------------------------|------|-------------------------|--------------------------------------------------------------------------|-----------|
| <b><u>Imine Condensation</u></b>     |      |                         |                                                                          |           |
| Andrew I. Cooper                     | 2009 | 40/533/624              | N <sub>2</sub> adsorption                                                | Ref S1    |
| Michael Mastalerz                    | 2010 | 1377                    | Selective CO <sub>2</sub> /CH <sub>4</sub> adsorption                    | Ref S2    |
| Andrew I. Cooper                     | 2010 | /                       | -                                                                        | Ref S3    |
| Andrew I. Cooper                     | 2011 | /                       | -                                                                        | Ref S4    |
| Andrew I. Cooper                     | 2011 | /                       | Adsorption                                                               | Ref S5    |
| Michael Mastalerz                    | 2011 | 2071                    | N <sub>2</sub> adsorption                                                | Ref S6    |
| Andrew I. Cooper                     | 2011 | 854/460                 | N <sub>2</sub> adsorption                                                | Ref S7    |
| Andrew I. Cooper                     | 2011 | 1333                    | Adsorption                                                               | Ref S8    |
| Ralf Warmuth                         | 2011 | /                       | Molecule recognition                                                     | Ref S9    |
| Michael Mastalerz                    | 2012 | 1700                    | CO <sub>2</sub> adsorption                                               | Ref S10   |
| Michael Mastalerz                    | 2012 | 30/744                  | N <sub>2</sub> adsorption                                                | Ref S11   |
| Stuart L. James                      | 2012 | 289                     | Adsorption                                                               | Ref S12   |
| Andrew I. Cooper                     | 2013 | /                       | -                                                                        | Ref S13   |
| Partha Sarathi Mukherjee             | 2013 | /                       | -                                                                        | Ref S14   |
| Dave J. Adams & Andrew I. Cooper     | 2013 | 41/93/252               | N <sub>2</sub> adsorption                                                | Ref S15   |
| Andrew I. Cooper                     | 2013 | /                       | -                                                                        | Ref S16   |
| Urszula Rychlewska                   | 2013 | /                       | -                                                                        | Ref S17   |
| Andrew I. Cooper                     | 2014 | 67/377                  | N <sub>2</sub> adsorption                                                | Ref S18   |
| Andrew I. Cooper                     | 2014 | 624                     | Separation of rare gases and chiral molecules                            | Ref S19   |
| Partha Sarathi Mukherjee             | 2014 | /                       | Picric acid detection                                                    | Ref S20   |
| Daqiang Yuan & Cheng Wang            | 2014 | 1181                    | Selective CO <sub>2</sub> /N <sub>2</sub> adsorption                     | Ref S21   |
| Kimoon Kim                           | 2015 | 935/1370                | Selective CO <sub>2</sub> /N <sub>2</sub> and CH <sub>4</sub> adsorption | Ref S22   |
| Alexandre Martinez                   | 2015 | /                       | Chiral sensors or catalysts                                              | Ref S23   |
| Andrew I. Cooper                     | 2015 | /                       | Adsorption                                                               | Ref S24   |
| Hao Li & Jonathan L. Sessler         | 2015 | /                       | -                                                                        | Ref S25   |
| Partha Sarathi Mukherjee             | 2015 | /                       | -                                                                        | Ref S26   |
| Michael Mastalerz                    | 2016 | 918/550/211             | N <sub>2</sub> adsorption                                                | Ref S27   |
| Michael E. Briggs & Andrew I. Cooper | 2016 | 10/423/1023             | N <sub>2</sub> adsorption                                                | Ref S28   |
| Bernard Tinant & Jean-Pierre Dutasta | 2016 | /                       | -                                                                        | Ref S29   |
| Xiaoyu Cao                           | 2016 | /                       | -                                                                        | Ref S30   |
| Andrew I. Cooper                     | 2016 | /                       | Protonic conductivity                                                    | Ref S31   |
| Hao Li                               | 2017 | /                       | P <sub>4</sub> capture                                                   | Ref S32   |
| Partha Sarathi Mukherjee             | 2017 | /                       | Recognition of nitroaromatics                                            | Ref S33   |
| Michael Mastalerz                    | 2017 | 443                     | N <sub>2</sub> adsorption                                                | Ref S34   |
| Andrew I. Cooper                     | 2017 | 320/2.7                 | Adsorption                                                               | Ref S35   |
| Xiaoyu Cao                           | 2017 | /                       | Chiral sensors and luminescent materials                                 | Ref S36   |
| Graeme M. Day & Andrew I. Cooper     | 2017 | 26-2037                 | -                                                                        | Ref S37   |
| Michael Mastalerz                    | 2017 | 67/377                  | Adsorption                                                               | Ref S38   |
| Andrew I. Cooper                     | 2017 | 307/532                 | N <sub>2</sub> adsorption                                                | Ref S39   |
| Xiaoyu Cao                           | 2017 | /                       | -                                                                        | Ref S40   |
| Michael Mastalerz                    | 2018 | /                       | Molecule recognition                                                     | Ref S41   |

|                                     |      |                |                                                      |         |
|-------------------------------------|------|----------------|------------------------------------------------------|---------|
| Andrew I. Cooper                    | 2018 | /              | -                                                    | Ref S42 |
| Hao Li                              | 2018 | /              | -                                                    | Ref S43 |
| Hao Li                              | 2018 | /              | Silver cation sensors                                | Ref S44 |
| Xiaoyu Cao                          | 2018 | /              | -                                                    | Ref S45 |
| Andrew I. Cooper & Kim E. Jelfs     | 2018 | 131            | Adsorption                                           | Ref S46 |
| Xiaoyu Cao                          | 2018 | /              | -                                                    | Ref S47 |
| Wei Zhang & Jianzhuang Jiang        | 2019 | /              | Container                                            | Ref S48 |
| Andrew I. Cooper & Kim E. Jelfs     | 2019 | /              | -                                                    | Ref S49 |
| Andrew I. Cooper                    | 2019 | /              | -                                                    | Ref S50 |
| Andrew I. Cooper                    | 2019 | 1752           | N <sub>2</sub> adsorption                            | Ref S51 |
| Andrew I. Cooper                    | 2019 | /              | Selective H <sub>2</sub> /D <sub>2</sub> adsorption  | Ref S52 |
| Shaodong Zhang                      | 2020 | /              | -                                                    | Ref S53 |
| Michael Mastalerz                   | 2020 | 698            | Sensing of either acid or base vapors                | Ref S54 |
| Kimoon Kim                          | 2020 | /              | -                                                    | Ref S55 |
| Shaodong Zhang                      | 2020 | /              | -                                                    | Ref S56 |
| Daqiang Yuan                        | 2020 | 38-2803        | Adsorption                                           | Ref S57 |
| Hao Li                              | 2020 | /              | Molecule recognition                                 | Ref S58 |
| Bernd M. Schmidt                    | 2020 | 536            | CO <sub>2</sub> and H <sub>2</sub> adsorption        | Ref S59 |
| Anna G. Slater                      | 2020 | /              | -                                                    | Ref S60 |
| Michael Mastalerz                   | 2021 | 1134/1212/1487 | Adsorption                                           | Ref S61 |
| Michael Mastalerz                   | 2021 | /              | -                                                    | Ref S62 |
| Guo-Hong Ning & Andrew I. Cooper    | 2021 | /              | Multiphoton harvesting                               | Ref S63 |
| Michael Mastalerz                   | 2022 | 5/705          | Adsorption                                           | Ref S64 |
| Chunyi Sun                          | 2023 | /              | Molecule recognition                                 | Ref S65 |
| <b><u>Boronic Condensation</u></b>  |      |                |                                                      |         |
| Nobuharu Iwasawa                    | 2009 | /              | Molecule recognition                                 | Ref S66 |
| Michael Mastalerz                   | 2013 | 3758           | N <sub>2</sub> adsorption                            | Ref S67 |
| Nobuharu Iwasawa                    | 2015 | /              | -                                                    | Ref S68 |
| Michael Mastalerz                   | 2018 | 12-511         | Selective ethane/ethylene adsorption                 | Ref S69 |
| Nobuharu Iwasawa                    | 2020 | /              | Molecule recognition                                 | Ref S70 |
| <b><u>Alkyne Metathesis</u></b>     |      |                |                                                      |         |
| Christian J. Doonana                | 2012 | 1153           | N <sub>2</sub> adsorption                            | Ref S71 |
| Jeffrey S. Moore                    | 2016 | /              | -                                                    | Ref S72 |
| Christian J. Doonana                | 2016 | 845            | N <sub>2</sub> adsorption                            | Ref S73 |
| <b><u>Irreversible Reaction</u></b> |      |                |                                                      |         |
| Alexandre Martinez                  | 2010 | /              | Molecular container                                  | Ref S74 |
| Mei-Xiang Wang                      | 2011 | /              | -                                                    | Ref S75 |
| De-Xian Wang & Mei-Xiang Wang       | 2011 | /              | Anion recognition                                    | Ref S76 |
| Alexandre Martinez                  | 2011 | /              | Anion recognition                                    | Ref S77 |
| Alexandre Martinez                  | 2013 | /              | Proton transfer                                      | Ref S78 |
| Yasutomo Segawa & Kenichiro Itami   | 2014 | /              | -                                                    | Ref S79 |
| J. Fraser Stoddart                  | 2014 | /              | Anion recognition                                    | Ref S80 |
| Hui-Bi Xu                           | 2015 | 432            | Selective CO <sub>2</sub> /N <sub>2</sub> adsorption | Ref S81 |
| Chun Zhang                          | 2016 | /              | Selective CO <sub>2</sub> /N <sub>2</sub> adsorption | Ref S82 |
| Mei-Xiang Wang, Qi-Qiang Wang,      | 2017 | /              | Adsorption                                           | Ref S83 |

|                                  |      |     |                                     |         |
|----------------------------------|------|-----|-------------------------------------|---------|
| Dongho Kim & Jonathan L. Sessler | 2018 | /   | -                                   | Ref S84 |
| Chun Zhang                       | 2018 | 929 | CO <sub>2</sub> capture and sensing | Ref S85 |
| J. Fraser Stoddart               | 2018 | /   | Molecule recognition                | Ref S86 |
| Qi-Qiang Wang & De-Xian Wang     | 2019 | /   | Anion recognition                   | Ref S87 |
| Qi-Qiang Wang                    | 2019 | /   | Adsorption                          | Ref S88 |
| Amar H. Flood                    | 2019 | /   | Chloride capture                    | Ref S89 |
| Hao Li                           | 2019 | /   | Molecule recognition                | Ref S90 |
| Alexandre Martinez               | 2019 | /   | Circularly polarized luminescence   | Ref S91 |
| Ben Zhong Tang                   | 2020 | /   | Temperature sensing in living cells | Ref S92 |
| J. Fraser Stoddart               | 2020 | /   | Molecule recognition                | Ref S93 |

## References

- S1. T. Tozawa, J. T. Jones, S. I. Swamy, S. Jiang, D. J. Adams, S. Shakespeare, R. Clowes, D. Bradshaw, T. Hasell, S. Y. Chong, C. Tang, S. Thompson, J. Parker, A. Trewin, J. Bacsá, A. M. Slawin, A. Steiner and A. I. Cooper, *Nat. Mater.*, 2009, **8**, 973-978.
- S2. M. Mastalerz, M. W. Schneider, I. M. Oppel and O. Presly, *Angew. Chem. Int. Ed.*, 2011, **50**, 1046-1051.
- S3. T. Hasell, X. Wu, J. T. A. Jones, J. Bacsá, A. Steiner, T. Mitra, A. Trewin, D. J. Adams and A. I. Cooper, *Nat. Chem.*, 2010, **2**, 750-755.
- S4. K. E. Jelfs, X. Wu, M. Schmidtman, J. T. Jones, J. E. Warren, D. J. Adams and A. I. Cooper, *Angew. Chem., Int. Ed.*, 2011, **50**, 10653-10656.
- S5. T. Mitra, X. Wu, R. Clowes, J. T. A. Jones, K. E. Jelfs, D. J. Adams, A. Trewin, J. Bacsá, A. Steiner and A. I. Cooper, *Chem. Eur. J.*, 2011, **17**, 10235-10240.
- S6. M. W. Schneider, I. M. Oppel, H. Ott, L. G. Lechner, H.-J. S. Hauswald, R. Stoll and M. Mastalerz, *Chem. Eur. J.*, 2012, **18**, 836-847.
- S7. M. J. Bojdys, M. E. Briggs, J. T. A. Jones, D. J. Adams, S. Y. Chong, M. Schmidtman and A. I. Cooper, *J. Am. Chem. Soc.*, 2011, **133**, 16566-16571.
- S8. J. T. Jones, T. Hasell, X. Wu, J. Bacsá, K. E. Jelfs, M. Schmidtman, S. Y. Chong, D. J. Adams, A. Trewin, F. Schiffman, F. Cora, B. Slater, A. Steiner, G. M. Day and A. I. Cooper, *Nature*, 2011, **474**, 367-371.
- S9. C. Givelet, J. Sun, D. Xu, T. J. Emge, A. Dhokte and R. Warmuth, *Chem. Commun.*, 2011, **47**, 4511-4513.
- S10. M. W. Schneider, I. M. Oppel, A. Griffin and M. Mastalerz, *Angew. Chem., Int. Ed.*, 2013, **52**, 3611-3615.
- S11. M. W. Schneider, I. M. Oppel and M. Mastalerz, *Chem. Eur. J.*, 2012, **18**, 4156-4160.
- S12. N. Giri, C. E. Davidson, G. Melaugh, M. G. Del Pópolo, J. T. A. Jones, T. Hasell, A. I. Cooper, P. N. Horton, M. B. Hursthouse and S. L. James, *Chem. Sci.*, 2012, **3**, 2153-2157.
- S13. M. E. Briggs, K. E. Jelfs, S. Y. Chong, C. Lester, M. Schmidtman, D. J. Adams and A. I. Cooper, *Cryst. Growth Des.*, 2013, **13**, 4993-5000.
- S14. K. Acharyya, S. Mukherjee and P. S. Mukherjee, *J. Am. Chem. Soc.*, 2013, **135**, 554-557.
- S15. J. L. Culshaw, G. Cheng, M. Schmidtman, T. Hasell, M. Liu, D. J. Adams and A. I. Cooper, *J. Am. Chem. Soc.*, 2013, **135**, 10007-10010.
- S16. K. E. Jelfs, E. G. Eden, J. L. Culshaw, S. Shakespeare, E. O. Pyzer-Knapp, H. P. Thompson, J. Bacsá, G. M. Day, D. J. Adams and A. I. Cooper, *J. Am. Chem. Soc.*, 2013, **135**, 9307-9310.
- S17. P. Skowronek, B. Warzajtis, U. Rychlewska and J. Gawroński, *Chem. Commun.*, 2013, **49**, 2524-2526.
- S18. M. Liu, M. A. Little, K. E. Jelfs, J. T. Jones, M. Schmidtman, S. Y. Chong, T. Hasell and A. I. Cooper, *J. Am. Chem. Soc.*, 2014, **136**, 7583-7586.
- S19. L. Chen, P. S. Reiss, S. Y. Chong, D. Holden, K. E. Jelfs, T. Hasell, M. A. Little, A. Kewley, M. E. Briggs, A. Stephenson, K. M. Thomas, J. A. Armstrong, J. Bell, J. Busto, R. Noel, J. Liu, D. M. Strachan, P. K. Thallapally and A. I. Cooper, *Nat. Mater.*, 2014, **13**, 954-960.
- S20. K. Acharyya and P. S. Mukherjee, *Chem. Commun.*, 2014, **50**, 15788-15791.
- S21. H. Ding, Y. Yang, B. Li, F. Pan, G. Zhu, M. Zeller, D. Yuan and C. Wang, *Chem. Commun.*, 2015, **51**, 1976-1979.
- S22. S. Hong, M. R. Rohman, J. Jia, Y. Kim, D. Moon, Y. Kim, Y. H. Ko, E. Lee and K. Kim, *Angew. Chem. Int. Ed.*, 2015, **54**, 13241-13244.
- S23. B. Chatelet, L. Joucla, D. Padula, L. D. Bari, G. Pilet, V. Robert, V. Dufaud, J.-P. Dutasta and A. Martinez, *Org. Lett.*, 2015, **17**, 500-503.
- S24. M. A. Little, M. E. Briggs, J. T. A. Jones, M. Schmidtman, T. Hasell, S. Y. Chong, K. E. Jelfs, L. Chen and A. I. Cooper, *Nat. Chem.*, 2015, **7**, 153-159.
- S25. H. Li, H. Zhang, A. D. Lammer, M. Wang, X. Li, V. M. Lynch and J. L. Sessler, *Nat. Chem.*, 2015, **7**, 1003-1008.
- S26. K. Acharyya and P. S. Mukherjee, *Chem. Commun.*, 2015, **51**, 4241-4244.

- S27. D. Beaudoin, F. Rominger and M. Mastalerz, *Angew. Chem. Int. Ed.*, 2017, **56**, 1244-1248.
- S28. P. S. Reiss, M. A. Little, V. Santolini, S. Y. Chong, T. Hasell, K. E. Jelfs, M. E. Briggs and A. I. Cooper, *Chem. Eur. J.*, 2016, **22**, 16547-16553.
- S29. I. Gosse, K. Robeyns, C. Bougault, A. Martinez, B. Tinant and J.-P. Dutasta, *Inorg. Chem.*, 2016, **55**, 1011-1013.
- S30. X. Wang, Y. Wang, H. Yang, H. Fang, R. Chen, Y. Sun, N. Zheng, K. Tan, X. Lu, Z. Tian and X. Cao, *Nat. Commun.*, 2016, **7**, 12469.
- S31. M. Liu, L. J. Chen, S. Lewis, S. Y. Chong, M. A. Little, T. Hasell, I. M. Aldous, C. M. Brown, M. W. Smith, C. A. Morrison, L. J. Hardwick and A. I. Cooper, *Nat. Commun.*, 2016, **7**, 12750.
- S32. T. Jiao, L. Chen, D. Yang, X. Li, G. Wu, P. Zeng, A. Zhou, Q. Yin, Y. Pan, B. Wu, X. Hong, X. Kong, V. M. Lynch, J. L. Sessler and H. Li, *Angew. Chem. Int. Ed.*, 2017, **56**, 14545-14550.
- S33. K. Acharyya, A. Chowdhury, B. Mondal, S. Chakraborty and P. S. Mukherjee, *Chem. Eur. J.*, 2017, **23**, 8482-8490.
- S34. J. C. Lauer, W.-S. Zhang, F. Rominger, R. R. Schröder and M. Mastalerz, *Chem. Eur. J.*, 2018, **24**, 1816-1820.
- S35. A. G. Slater, P. S. Reiss, A. Pulido, M. A. Little, D. L. Holden, L. Chen, S. Y. Chong, B. M. Alston, R. Clowes, M. Haranczyk, M. E. Briggs, T. Hasell, G. M. Day and A. I. Cooper, *ACS Cent. Sci.*, 2017, **3**, 734-742.
- S36. H. Qu, Y. Wang, Z. Li, X. Wang, H. Fang, Z. Tian and X. Cao, *J. Am. Chem. Soc.*, 2017, **139**, 18142-18145.
- S37. A. G. Slater, M. A. Little, A. Pulido, S. Y. Chong, D. Holden, L. Chen, C. Morgan, X. Wu, G. Cheng, R. Clowes, M. E. Briggs, T. Hasell, K. E. Jelfs, G. M. Day and A. I. Cooper, *Nat. Chem.*, 2017, **9**, 17-25.
- S38. X. Y. Hu, W. S. Zhang, F. Rominger, I. Wacker, R. R. Schroder and M. Mastalerz, *Chem. Commun.*, 2017, **53**, 8616-8619.
- S39. T. Hasell, M. A. Little, S. Y. Chong, M. Schmidtman, M. E. Briggs, V. Santolini, K. E. Jelfs and A. I. Cooper, *Nanoscale*, 2017, **9**, 6783-6790.
- S40. X. Wang, P. Peng, W. Xuan, Y. Wang, Y. Zhuang, Z. Tian and X. Cao, *Org. Biomol. Chem.*, 2018, **16**, 34-37.
- S41. T. H. G. Schick, J. C. Lauer, F. Rominger and M. Mastalerz, *Angew. Chem. Int. Ed.*, 2019, **58**, 1768-1773.
- S42. C. J. Pugh, V. Santolini, R. L. Greenaway, M. A. Little, M. E. Briggs, K. E. Jelfs and A. I. Cooper, *Cryst. Growth Des.*, 2018, **18**, 2759-2764.
- S43. T. Jiao, G. Wu, L. Chen, C.-Y. Wang and H. Li, *J. Org. Chem.*, 2018, **83**, 12404-12410.
- S44. N. Cao, Y. Wang, X. Zheng, T. Jiao and H. Li, *Org. Lett.*, 2018, **20**, 7447-7450.
- S45. Y. Wang, H. Fang, I. Tranca, H. Qu, X. Wang, A. J. Markvoort, Z. Tian and X. Cao, *Nat. Commun.*, 2018, **9**, 488.
- S46. R. L. Greenaway, V. Santolini, M. J. Bennison, B. M. Alston, C. J. Pugh, M. A. Little, M. Miklitz, E. G. B. Eden-Rump, R. Clowes, A. Shakil, H. J. Cuthbertson, H. Armstrong, M. E. Briggs, K. E. Jelfs and A. I. Cooper, *Nat. Commun.*, 2018, **9**, 2849.
- S47. P. Zhang, X. Wang, W. Xuan, P. Peng, Z. Li, R. Lu, S. Wu, Z. Tian and X. Cao, *Chem. Commun.*, 2018, **54**, 4685-4688.
- S48. N. Sun, C. Wang, H. Wang, L. Yang, P. Jin, W. Zhang and J. Jiang, *Angew. Chem. Int. Ed.*, 2019, **58**, 18011-18016.
- S49. R. L. Greenaway, V. Santolini, A. Pulido, M. A. Little, B. M. Alston, M. E. Briggs, G. M. Day, A. I. Cooper and K. E. Jelfs, *Angew. Chem. Int. Ed.*, 2019, **58**, 16275-16281.
- S50. R. L. Greenaway, V. Santolini, F. T. Szczypinski, M. J. Bennison, M. A. Little, A. Marsh, K. E. Jelfs and A. I. Cooper, *Chem. Eur. J.*, 2020, **26**, 3718-3722.
- S51. B. Teng, M. A. Little, T. Hasell, S. Y. Chong, K. E. Jelfs, R. Clowes, M. E. Briggs and A. I. Cooper, *Cryst. Growth Des.*, 2019, **19**, 3647-3651.
- S52. M. Liu, L. Zhang, M. A. Little, V. Kapil, M. Ceriotti, S. Yang, L. Ding, D. L. Holden, R. Balderas-Xicohtencatl, D. He, R. Clowes, S. Y. Chong, G. Schutz, L. Chen, M. Hirscher and A. I. Cooper, *Science*, 2019, **366**, 613-620.
- S53. P. Li, S. Xu, C. Yu, Z. Y. Li, J. Xu, Z. M. Li, L. Zou, X. Leng, S. Gao, Z. Liu, X. Liu and S. Zhang, *Angew. Chem. Int. Ed.*, 2020, **59**, 7113-7121.
- S54. P.-E. Alexandre, W.-S. Zhang, F. Rominger, S. M. Elbert, R. R. Schröder and M. Mastalerz, *Angew. Chem. Int. Ed.*, 2020, **59**, 19675-19679.
- S55. J. Koo, I. Kim, Y. Kim, D. Cho, I.-C. Hwang, R. D. Mukhopadhyay, H. Song, Y. H. Ko, A. Dhamija, H. Lee, W. Hwang, S.

- Kim, M.-H. Baik and K. Kim, *Chem*, 2020, **6**, 3374-3384.
- S56. Z. Sun, P. Li, S. Xu, Z.-Y. Li, Y. Nomura, Z. Li, X. Liu and S. Zhang, *J. Am. Chem. Soc.*, 2020, **142**, 10833-10840.
- S57. K. Su, W. Wang, S. Du, C. Ji, M. Zhou and D. Yuan, *J. Am. Chem. Soc.*, 2020, **142**, 18060-18072.
- S58. C. Zhang, T. Jiao, L. Tong, H. Wang, Y. Pan and H. Li, *Chem. Commun.*, 2020, **56**, 3903-3906.
- S59. T. Kunde, E. Nieland, H. V. Schröder, C. A. Schalley and B. M. Schmidt, *Chem. Commun.*, 2020, **56**, 4761-4764.
- S60. V. Abet, F. T. Szczypiński, M. A. Little, V. Santolini, C. D. Jones, R. Evans, C. Wilson, X. Wu, M. F. Thorne, M. J. Bennison, P. Cui, A. I. Cooper, K. E. Jelfs and A. G. Slater, *Angew. Chem. Int. Ed.*, 2020, **59**, 16755-16763.
- S61. M. Mastalerz, P. Wagner, F. Rominger, W.-S. Zhang, J. H. Gross, S. M. Elbert and R. R. Schröder, *Angew. Chem. Int. Ed.*, 2021, **60**, 8896-8904.
- S62. M. Holsten, S. Feierabend, S. M. Elbert, F. Rominger, T. Oeser and M. Mastalerz, *Chem. Eur. J.*, 2021, **27**, 9383-9390.
- S63. G.-H. Ning, P. Cui, I. V. Sazanovich, J. T. Pegg, Q. Zhu, Z. Pang, R.-J. Wei, M. Towrie, K. E. Jelfs, M. A. Little and A. I. Cooper, *Chem*, 2021, **7**, 3157-3170.
- S64. K. Tian, S. M. Elbert, X.-Y. Hu, T. Kirschbaum, W.-S. Zhang, F. Rominger, R. R. Schröder and M. Mastalerz, *Adv. Mater.*, 2022, **34**, 2202290.
- S65. J. Kou, Q. Wu, D. Cui, Y. Geng, K. Zhang, M. Zhang, H. Zang, X. Wang, Z. Su and C. Sun, *Angew. Chem. Int. Ed.*, 2023, **62**, e202312733.
- S66. H. Takahagi, S. Fujibe and N. Iwasawa, *Chem. Eur. J.*, 2009, **15**, 13327-13330.
- S67. G. Zhang, O. Presly, F. White, I. M. Oppel and M. Mastalerz, *Angew. Chem. Int. Ed.*, 2014, **53**, 1516-1520.
- S68. K. Ono, K. Johmoto, N. Yasuda, H. Uekusa, S. Fujii, M. Kiguchi and N. Iwasawa, *J. Am. Chem. Soc.*, 2015, **137**, 7015-7018.
- S69. S. M. Elbert, N. I. Regenauer, D. Schindler, W. S. Zhang, F. Rominger, R. R. Schroder and M. Mastalerz, *Chem. Eur. J.*, 2018, **24**, 11438-11443.
- S70. H. Takata, K. Ono and N. Iwasawa, *Chem. Commun.*, 2020, **56**, 5613-5616.
- S71. A. Avellaneda, P. Valente, A. Burgun, J. D. Evans, A. W. Markwell-Heys, D. Rankine, D. J. Nielsen, M. R. Hill, C. J. Sumbly and C. J. Doonan, *Angew. Chem., Int. Ed.*, 2013, **52**, 3746-3749.
- S72. S. Lee, A. Yang, T. P. Moneypenny, 2nd and J. S. Moore, *J. Am. Chem. Soc.*, 2016, **138**, 2182-2185.
- S73. A. Burgun, P. Valente, J. D. Evans, D. M. Huang, C. J. Sumbly and C. J. Doonan, *Chem. Commun.*, 2016, **52**, 8850-8853.
- S74. P. D. Raytchev, O. Perraud, C. Aronica, A. Martinez and J.-P. Dutasta, *J. Org. Chem.*, 2010, **75**, 2099-2102.
- S75. M. M. Naseer, D.-X. Wang, L. Zhao, Z.-T. Huang and M.-X. Wang, *J. Org. Chem.*, 2011, **76**, 1804-1813.
- S76. Y. Chen, D.-X. Wang, Z.-T. Huang and M.-X. Wang, *Chem. Commun.*, 2011, **47**, 8112-8114.
- S77. O. Perraud, V. Robert, H. Gornitzka, A. Martinez and J.-P. Dutasta, *Angew. Chem. Int. Ed.*, 2012, **51**, 504-508.
- S78. B. Chatelet, H. Gornitzka, V. Dufaud, E. Jeanneau, J.-P. Dutasta and A. Martinez, *J. Am. Chem. Soc.*, 2013, **135**, 18659-18664.
- S79. K. Matsui, Y. Segawa and K. Itami, *J. Am. Chem. Soc.*, 2014, **136**, 16452-16458.
- S80. N. Hafezi, J. M. Holcroft, K. J. Hartlieb, E. J. Dale, N. A. Vermeulen, C. L. Stern, A. A. Sarjeant and J. F. Stoddart, *Angew. Chem. Int. Ed.*, 2015, **54**, 456-461.
- S81. C. Zhang, Z. Wang, L. Tan, T.-L. Zhai, S. Wang, B. Tan, Y.-S. Zheng, X.-L. Yang and H.-B. Xu, *Angew. Chem. Int. Ed.*, 2015, **54**, 9244-9248.
- S82. Z. Wang, Y. Luo, T.-L. Zhai, H. Ma, J.-J. Chen, Y. Shu and C. Zhang, *Org. Lett.*, 2016, **18**, 4574-4577.
- S83. Q.-Q. Wang, N. Luo, X.-D. Wang, Y.-F. Ao, Y.-F. Chen, J.-M. Liu, C.-Y. Su, D.-X. Wang and M.-X. Wang, *J. Am. Chem. Soc.*, 2017, **139**, 635-638.
- S84. X.-S. Ke, T. Kim, Q. He, V. M. Lynch, D. Kim and J. L. Sessler, *J. Am. Chem. Soc.*, 2018, **140**, 16455-16459.
- S85. Z. Wang, H. Ma, T.-L. Zhai, G. Cheng, Q. Xu, J.-M. Liu, J. Yang, Q.-M. Zhang, Q.-P. Zhang, Y.-S. Zheng, B. Tan and C. Zhang, *Adv.Sci.*, 2018, **5**, 1800141.
- S86. Y. Shi, K. Cai, H. Xiao, Z. Liu, J. Zhou, D. Shen, Y. Qiu, Q.-H. Guo, C. Stern, M. R. Wasielewski, F. Diederich, W. A. Goddard, III and J. F. Stoddart, *J. Am. Chem. Soc.*, 2018, **140**, 13835-13842.

- S87. D.-H. Tuo, Y.-F. Ao, Q.-Q. Wang and D.-X. Wang, *Org. Lett.*, 2019, **21**, 7158-7162.
- S88. J.-X. Ma, J. Li, Y.-F. Chen, R. Ning, Y.-F. Ao, J.-M. Liu, J. Sun, D.-X. Wang and Q.-Q. Wang, *J. Am. Chem. Soc.*, 2019, **141**, 3843-3848.
- S89. Y. Liu, W. Zhao, C.-H. Chen and A. H. Flood, *Science*, 2019, **365**, 159-161.
- S90. T. Jiao, K. Cai, Z. Liu, G. Wu, L. Shen, C. Cheng, Y. Feng, C. L. Stern, J. F. Stoddart and H. Li, *Chem. Sci.*, 2019, **10**, 5114-5123.
- S91. A. Long, M. Jean, M. Albalat, N. Vanthuynne, M. Giorgi, M. Górecki, J.-P. Dutasta and A. Martinez, *Chirality*, 2019, **31**, 910-916.
- S92. Z. Wang, X. He, T. Yong, Y. Miao, C. Zhang and B. Zhong Tang, *J. Am. Chem. Soc.*, 2020, **142**, 512-519.
- S93. W. Liu, C. L. Stern and J. F. Stoddart, *J. Am. Chem. Soc.*, 2020, **142**, 10273-10278.
